# Supplementary material for: Building a transdisciplinary expert consensus on the cognitive drivers of performance under pressure: An international multi-panel Delphi study
Source: PubMed Central journal article supplement (PMC9901503; doi:10.3389/fpsyg.2022.1017675), 2023-01-18
Supplement: Image_1.pdf [file Image_1.pdf]

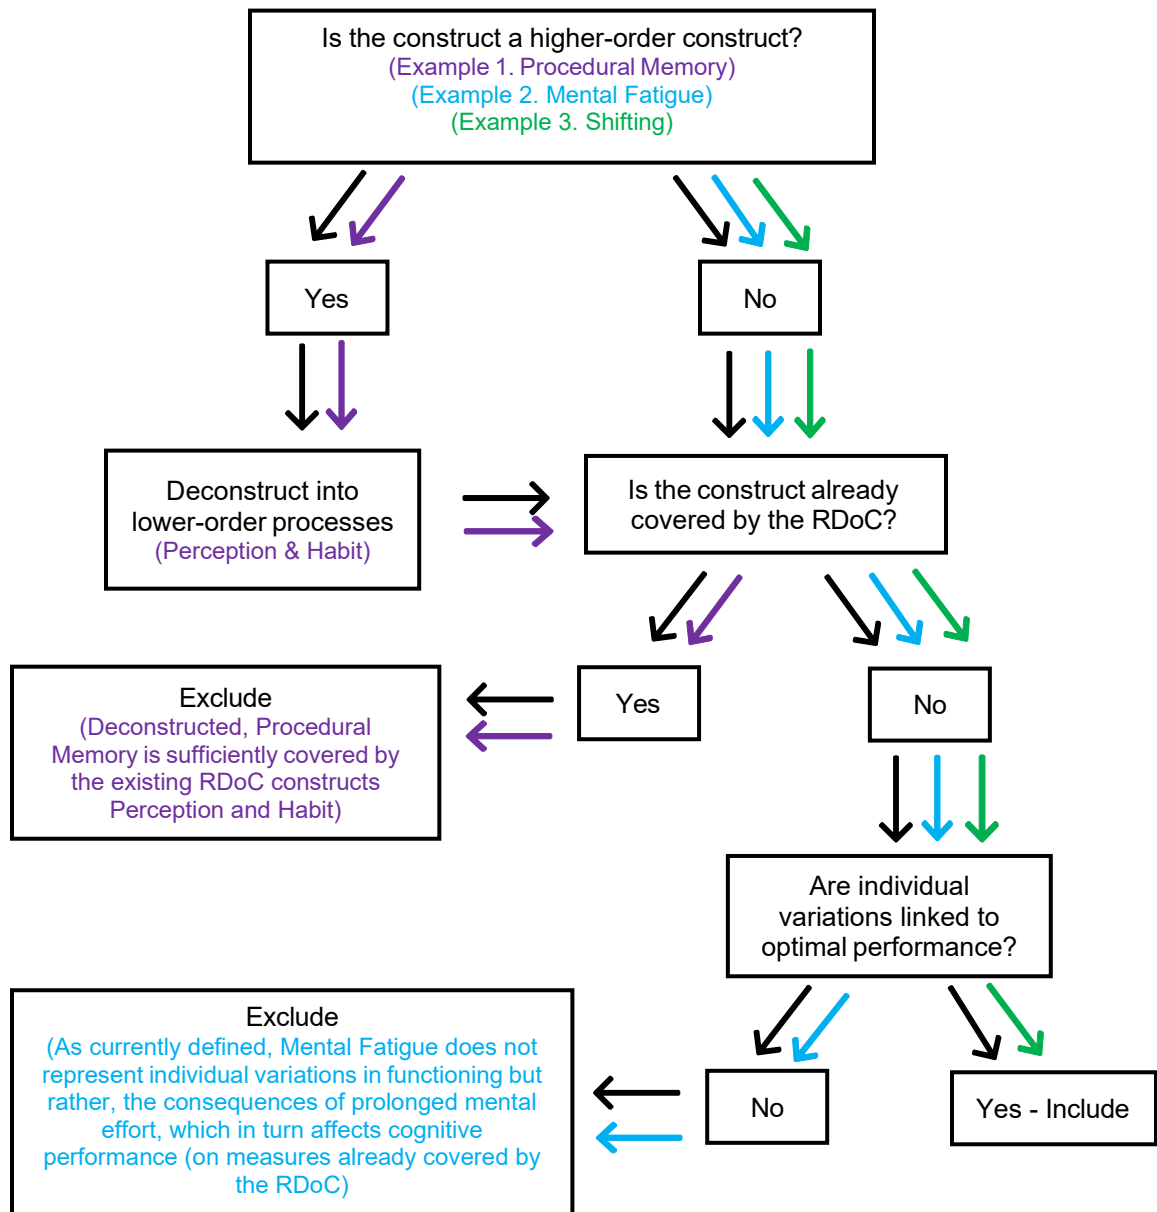

**Figure S1.** Decision making sequence for including expert-suggested constructs into the Delphi survey, including three examples of decisions made (represented by different colors).
